# Supplementary material for: A Phenotyping Platform to Characterize Healthy Individuals Across Four Stages of Life - The Enable Study
Source: PubMed Central journal article supplement (PMC7657309; doi:10.3389/fnut.2020.582387), 2020-10-28
Supplement: Data_Sheet_1.pdf [file Data_Sheet_1.pdf]

## *Supplementary Material*

**Table 1. Study characteristics of 3- to 5-year old children.**

|                                       | <b>male</b> | <b>female</b> | <b>p-value</b> |
|---------------------------------------|-------------|---------------|----------------|
| <b>n</b>                              | 24          | 20            |                |
| <b>Anthropometric</b>                 |             |               |                |
| Age,y                                 | 4.38±0.82   | 3.9±0.91      | ns             |
| Height, cm                            | 110.9±8.50  | 105.8±9.57    | ns             |
| Waist circumference, cm               | 50.8±4.83   | 49.6±4.41     | ns             |
| Hip circumference, cm                 | 56.7±4.86   | 54.7±4.57     | ns             |
| Waist-to Hip ratio                    | 0.90±0.06   | 0.91±0.04     | ns             |
| Brain circumference, cm               | 51.3±2.16   | 49.7±2.61     | ns             |
| Skin fold thickness, triceps, cm      | 0.82±0.29   | 0.84±0.35     | ns             |
| Skin fold thickness, subscapular, cm  | 0.89±1.11   | 0.66±0.33     | ns             |
| Skin fold thickness, suprailiacal, cm | 0.71±0.40   | 0.69±0.37     | ns             |
| Body mass index-SDS                   | -0.31±1.11  | -0.55±0.85    | ns             |
| Body mass index -percentile           | 41.9±26.9   | 33.6±26.4     | ns             |
| <b>Body composition</b>               |             |               |                |
| Seca, body weight, kg                 | 18.9±3.59   | 16.7±3.54     | ns             |
| Bod Pod, Body weight, kg              | 18.9±3.76   | 16.9±3.92     | ns             |
| Bod Pod, Fat mass, kg                 | 3.8±2.12    | 2.9±1.22      | ns             |
| Bod Pod, Fat free mass, kg            | 15.1±3.03   | 13.9±3.29     | ns             |

Data are presented as mean ± standard deviation. *P*-values <0.05 were regarded as statistically significant. Mann-Whitney U test was used to test for significance between males and females in the cohort. ns, not significant.

**Table 2. Study characteristics of young adults.**

|                            | <b>male</b> | <b>female</b> | <b>p-value</b> |
|----------------------------|-------------|---------------|----------------|
| <b>n</b>                   | 48          | 46            |                |
| <b>Anthropometric</b>      |             |               |                |
| Age,y                      | 22.3±2.1    | 22.0±1.85     | ns             |
| Height, cm                 | 182.6±7.45  | 168.6±5.93    | < 0.0001       |
| Waist circumference, cm    | 80.8±8.81   | 75.1±6.14     | < 0.001        |
| Hip circumference, cm      | 95.4±6.42   | 95.9±5.63     | ns             |
| Waist-to Hip ratio         | 0.85±0.05   | 0.78±0.06     | < 0.0001       |
| BMI, kg/m <sup>2</sup>     | 22.7±2.99   | 21.5±1.86     | ns             |
| BMI - SDS                  | -0.36±0.97  | -0.41±0.64    | ns             |
| BMI - percentile           | 39.5±28.7   | 36.6±21.6     | ns             |
| <b>Body composition</b>    |             |               |                |
| Seca                       |             |               |                |
| Body weight, kg            | 75.7±11.4   | 61.1±6.31     | < 0.0001       |
| Fat mass, kg               | 12.2±7.22   | 15.9±3.67     | < 0.0001       |
| Fat free mass, kg          | 63.5±6.28   | 45.2±4.32     | < 0.0001       |
| Bod Pod                    |             |               |                |
| Body weight, kg            | 75.7±11.3   | 61.1±6.31     | < 0.0001       |
| Fat mass, kg               | 11.6±6.84   | 16.8±4.22     | < 0.0001       |
| Fat free mass, kg          | 64.0±7.69   | 44.2±5.04     | < 0.0001       |
| <b>Laboratory analysis</b> |             |               |                |
| AST, U/l                   | 22.6±6.62   | 21.4±8.27     | ns             |
| ALT, U/l                   | 27.8±9.89   | 20.2±10.2     | < 0.0001       |
| γGT, U/l                   | 20.5±12.1   | 13.5±8.58     | < 0.0001       |
| Sodium, mmol/l             | 140.9±2.12  | 140.4±1.79    | ns             |
| Potassium, mmol/l          | 4.32±0.28   | 4.27±0.26     | ns             |
| Calcium, mmol/l            | 2.41±0.15   | 2.35±0.09     | < 0.001        |
| Phosphorus, mmol/l         | 3.49±0.39   | 3.88±0.39     | < 0.0001       |
| Magnesium, , mmol/l        | 0.87±0.04   | 0.85±0.05     | < 0.05         |
| Cholesterol, mg/dl         | 168.0±27.9  | 189.9±31.3    | < 0.001        |
| Triglycerides, mg/dl       | 92.8±44.8   | 94.8±35.9     | ns             |
| HDL-cholesterol, mg/dl     | 51.7±11.4   | 69.5±15.7     | < 0.0001       |
| LDL-cholesterol, mg/dl     | 97.2±25.4   | 106.8±27.5    | ns             |

|                              |           |           |          |
|------------------------------|-----------|-----------|----------|
| LDL/HDL                      | 1.98±0.66 | 1.60±0.52 | < 0.05   |
| Creatinine, mg/dl            | 0.87±0.11 | 0.74±0.10 | < 0.0001 |
| Urea, mg/dl                  | 29.2±5.88 | 24.7±5.14 | < 0.001  |
| Uric acid, mg/dl             | 5.74±0.95 | 4.51±1.06 | < 0.0001 |
| Fasting blood glucose, mg/dl | 77.5±5.55 | 75.2±5.81 | ns       |
| Fasting insulin, µU/ml       | 2.94±1.89 | 3.47±1.73 | < 0.05   |
| TSH, µU/ml                   | 1.92±0.84 | 1.63±0.89 | ns       |
| FT3, pg/ml                   | 3.68±0.40 | 3.19±0.42 | < 0.0001 |
| FT4, ng/dl                   | 1.23±0.16 | 1.08±0.14 | < 0.0001 |

Data are presented as mean ± standard deviation. *P*-values <0.05 were regarded as statistically significant. Mann-Whitney U test was used to test for significance between female and male participants. AST, aspartate aminotransferase; ALT, alanine aminotransferase; BMI, body mass index; γGT, gamma glutamyltransferase; HDL, high- density lipoprotein; LDL, low-density lipoprotein; ns, not significant; TSH, thyroid-stimulating hormone; FT3, free thyroxine; FT4, free triiodothyronine.

**Table 3. Characteristics of middle agers.**

|                           | Middle agers without cardiometabolic risk |            |         | Middle agers with cardiometabolic risk |            |         |
|---------------------------|-------------------------------------------|------------|---------|----------------------------------------|------------|---------|
|                           | male                                      | female     | p-value | male                                   | female     | p-value |
| <b>n</b>                  | 56                                        | 52         |         | 46                                     | 51         |         |
| <b>Anthropometry</b>      |                                           |            |         |                                        |            |         |
| Age, y                    | 52.1±7.1                                  | 52.2±6.05  | ns      | 55.2±6.69                              | 50.6±7.22  | < 0.01  |
| Height, cm                | 179.3±5.84                                | 165.3±6.24 | <0.0001 | 179.7±5.28                             | 165.9±6.10 | <0.0001 |
| Waist circumference, cm   | 91.8±6.48                                 | 76.3±7.38  | < 0.001 | 111.0±6.01                             | 99.2±7.83  | <0.0001 |
| Hip circumference, cm     | 98.2±4.69                                 | 95.1±7.77  | < 0.01  | 108.1±4.38                             | 112.4±7.44 | <0.001  |
| Waist-to Hip ratio        | 0.93±0.05                                 | 0.80±0.05  | <0.0001 | 1.03±0.06                              | 0.88±0.06  | <0.0001 |
| BMI, kg/m <sup>2</sup>    | 25.4±2.08                                 | 22.9±3.2   | <0.0001 | 31.6±2.15                              | 30.6±3.24  | ns      |
| BMI -SDS                  | 0.45±0.6                                  | -0.12±0.93 | < 0.001 | 1.83±0.39                              | 1.57±0.50  | 0.01    |
| BMI -Percentile           | 65.6±20.32                                | 46.4±29.01 | < 0.001 | 95.6±3.84                              | 91.9±9.47  | 0.01    |
|                           |                                           |            |         |                                        |            |         |
| <b>Body composition</b>   |                                           |            |         |                                        |            |         |
| <b>Seca</b>               |                                           |            |         |                                        |            |         |
| Body weight, kg           | 81.9±7.95                                 | 62.7±9.67  | <0.0001 | 102.1±8.20                             | 84.3±10.4  | <0.0001 |
| Fat mass, kg              | 19.8±4.82                                 | 20.2±6.76  | ns      | 32.9±5.27                              | 36.5±7.05  | 0.01    |
| Fat free mass, kg         | 62.03±5.2                                 | 42.5±4.87  | <0.0001 | 69.2±5.48                              | 47.8±4.66  | <0.0001 |
| <b>Bod Pod</b>            |                                           |            |         |                                        |            |         |
| Body weight, kg           | 81.9±7.93                                 | 62.7±9.69  | <0.0001 | 102.1±8.20                             | 84.2±10.4  | <0.0001 |
| Fat mass, kg              | 20.1±5.09                                 | 19.7±7.18  | ns      | 36.2±6.15                              | 38.2±7.78  | ns      |
| Fat free mass, kg         | 61.87±5.7                                 | 43.1±4.71  | <0.0001 | 65.8±5.52                              | 46.1±4.83  | <0.0001 |
|                           |                                           |            |         |                                        |            |         |
| <b>Clinical chemistry</b> |                                           |            |         |                                        |            |         |
| AST, U/l                  | 24.9±9.63                                 | 22.3±6.05  | ns      | 27.0±11.4                              | 21.3±7.48  | 0.01    |
| ALT, U/l                  | 29.6±12.8                                 | 21.6±7.42  | <0.0001 | 38.2±17.7                              | 23.7±11.3  | <0.0001 |
| γGT, U/l                  | 33.1±26.8                                 | 16.5±10.2  | <0.0001 | 44.9±32.9                              | 21.7±18.3  | <0.0001 |
| Sodium, mmol/l            | 141.0±1.94                                | 141.3±1.69 | ns      | 140.5±1.83                             | 141.4±1.72 | 0.02    |
| Potassium, mmol/l         | 4.50±0.37                                 | 4.43±0.33  | ns      | 4.34±0.30                              | 4.46±0.34  | ns      |
| Calcium, mmol/l           | 2.31±0.09                                 | 2.34±0.1   | ns      | 2.30±0.09                              | 2.29±0.10  | ns      |
| Phosphorus, mmol/l        | 3.31±0.40                                 | 3.71±0.46  | <0.0001 | 3.23±0.40                              | 3.57±0.38  | <0.0001 |
| Magnesium, , mmol/l       | 0.88±0.05                                 | 0.89±0.08  | ns      | 0.87±0.05                              | 0.87±0.05  | ns      |
| Cholesterol, mg/dl        | 220.3±28.5                                | 228.8±48.6 | ns      | 215.7±32.4                             | 226.0±41.7 | <0.0001 |
| Triglycerides, mg/dl      | 113.9±58.6                                | 84.6±42.6  | < 0.01  | 172.9±80.4                             | 120.1±44.3 | <0.001  |
| HDL-cholesterol, mg/dl    | 54.7±11.3                                 | 72.9±17.6  | <0.0001 | 47.5±11.2                              | 61.6±13.3  | <0.0001 |

|                              |            |            |         |            |            |         |
|------------------------------|------------|------------|---------|------------|------------|---------|
| LDL-cholesterol, mg/dl       | 139.8±27.6 | 132.7±46.7 | ns      | 143.0±33.6 | 144.9±36.9 | ns      |
| LDL/HDL                      | 2.70±0.88  | 1.93±0.84  | <0.0001 | 3.16±0.93  | 2.46±0.79  | <0.001  |
| Creatinine, mg/dl            | 0.91±0.13  | 0.75±0.10  | <0.0001 | 0.88±0.11  | 0.72±0.09  | <0.0001 |
| Urea, mg/dl                  | 34.8±7.46  | 29.9±7.72  | < 0.01  | 6.98±1.32  | 28.1±6.17  | 0.02    |
| Uric acid, mg/dl             | 6.18±1.12  | 4.31±0.84  | <0.0001 | 6.98±1.32  | 5.09±1.05  | <0.0001 |
| Fasting blood glucose, mg/dl | 84.5±7.37  | 80.2±8.0   | < 0.01  | 98.6±33.6  | 83.7±8.6   | <0.0001 |
| Fasting insulin, µU/ml       | 3.72±2.45  | 3.50±3.75  | ns      | 9.33±4.86  | 7.66±7.38  | <0.01   |
| TSH, µU/ml                   | 1.50±0.83  | 1.25±0.59  | ns      | 1.44±0.70  | 1.31±0.60  | ns      |
| FT3, pg/ml                   | 3.29±0.83  | 3.07±0.38  | <0.0001 | 3.39±0.24  | 3.12±0.30  | <0.0001 |
| FT4, ng/dl                   | 1.15±0.32  | 1.11±0.17  | ns      | 1.14±0.17  | 1.12±0.17  | ns      |

Data are presented as mean ± standard deviation. *P*-values <0.05 were regarded as statistically significant. Mann-Whitney U test was used to test for significance between female and male participants. AST, aspartate aminotransferase; ALT, alanine aminotransferase; BMI, body mass index; γGT, gamma glutamyltransferase; HDL, high- density lipoprotein; LDL, low- density lipoprotein; MetS, metabolic syndrome; ns, not significant; TSH, thyroid-stimulating hormone; FT3, free thyroxine; FT4, free triiodothyronine.

**Table 4. Study characteristics of older adults.**

|                                         | <b>male</b> | <b>female</b> | <b>p-value</b> |
|-----------------------------------------|-------------|---------------|----------------|
| <b>n</b>                                | 81          | 79            |                |
| <b>Anthropometric</b>                   |             |               |                |
| Age,y                                   | 78.1±2.51   | 78.2±2.98     | ns             |
| Height, cm                              | 172.9±6.81  | 160.4±6.47    | <0.0001        |
| Waist circumference, cm                 | 102.3±11.3  | 90.0±12.9     | <0.0001        |
| Hip circumference, cm                   | 102.6±7.42  | 102.6±9.58    | ns             |
| Waist-to Hip ratio                      | 1.0±0.08    | 0.88±0.09     | <0.0001        |
| Upper arm circumference, cm             | 30.0±2.63   | 28.5±3.27     | <0.001         |
| Calf circumference                      | 36.9±2.59   | 35.8±2.76     | ns             |
| BMI, kg/m <sup>2</sup>                  | 27.1±3.54   | 25.9±4.29     | <0.05          |
| BMI-SDS                                 | 0.69±0.91   | 0.72±1.02     | ns             |
| BMI-percentile                          | 70.7±25.9   | 70.5±27.9     | ns             |
| <b>Body composition</b>                 |             |               |                |
| <b>Seca</b>                             |             |               |                |
| Body weight, kg                         | 81.7±11.4   | 67.2±11.2     | <0.0001        |
| Fat mass, kg                            | 25.7±7.25   | 28.9±8.18     | <0.001         |
| Fat free mass, kg                       | 56.0±5.95   | 38.2±4.87     | <0.0001        |
| <b>BODPOD (only cohort in Freising)</b> |             |               |                |
| Body weight, kg                         | 79.7±10.9   | 65.0±11.4     | <0.0001        |
| Fat mass, kg                            | 24.7±6.99   | 24.7±10.2     | ns             |
| Fat free mass, kg                       | 54.9±6.29   | 40.3±3.06     | <0.0001        |
| <b>Laboratory analysis</b>              |             |               |                |
| AST, U/l                                | 25.1±8.06   | 22.6±7.45     | <0.05          |
| ALT, U/l                                | 22.9±8.88   | 20.3±7.40     | <0.05          |
| γGT, U/l                                | 35.1±33.6   | 20.5±9.81     | <0.0001        |
| Sodium, mmol/l                          | 141.6±2.20  | 142.1±2.36    | <0.05          |
| Potassium, mmol/l                       | 4.67±0.55   | 4.60±0.47     | ns             |
| Calcium, mmol/l                         | 2.32±0.10   | 2.40±0.11     | <0.05          |
| Phosphorus, mmol/l                      | 2.96±0.44   | 3.47±0.48     | <0.0001        |
| Magnesium, , mmol/l                     | 0.89±0.06   | 0.9±0.06      | ns             |
| Cholesterol, mg/dl                      | 207.0±40.5  | 235.1±41.5    | <0.0001        |
| Triglycerides, mg/dl                    | 106.2±42.4  | 108.5±44.5    | ns             |

|                              |            |            |         |
|------------------------------|------------|------------|---------|
| HDL-cholesterol, mg/dl       | 57.4±13.1  | 71.1±17.4  | <0.0001 |
| LDL-cholesterol, mg/dl       | 130.7±37.8 | 145.1±38.1 | <0.05   |
| LDL/HDL                      | 2.39±0.86  | 2.80±0.79  | ns      |
| Creatinine, mg/dl            | 0.95±0.19  | 0.76±0.13  | <0.0001 |
| Urea, mg/dl                  | 40.3±10.9  | 33.6±7.31  | <0.0001 |
| Uric acid, mg/dl             | 6.37±1.21  | 5.27±1.19  | <0.0001 |
| Fasting blood glucose, mg/dl | 90.9±10.51 | 87.3±7.82  | <0.05   |
| Fasting insulin, µU/ml       | 5.09±3.80  | 5.01±4.28  | ns      |
| TSH, µU/ml                   | 1.23±0.58  | 1.45±1.77  | ns      |
| FT3, pg/ml                   | 3.23±0.38  | 2.95±0.31  | <0.0001 |
| FT4, ng/dl                   | 1.15±0.18  | 1.17±0.20  | ns      |

Data are presented as mean ± standard deviation. *P*-values <0.05 were regarded as statistically significant. Mann-Whitney U test was used to test for significance between female and male participants. AST, aspartate aminotransferase; ALT, alanine aminotransferase; BMI, body mass index, γGT, gamma glutamyltransferase; HDL, high- density lipoprotein; LDL, low- density lipoprotein; ns, not significant; TSH, thyroid-stimulating hormone; FT3, free thyroxine; FT4, free triiodothyronine.
